# Supplementary material
Source: ML conference proceedings conference paper supplement (https://proceedings.neurips.cc/paper_files/paper/2019/hash/b9cfe8b6042cf759dc4c0cccb27a6737-Abstract.html)
Supplement: Supplementary file [file b9cfe8b6042cf759dc4c0cccb27a6737-Supplemental.zip]

---

# Supplementary Material: A General Theory of Equivariant CNNs on Homogeneous Spaces

---

**Taco S. Cohen**  
Qualcomm AI Research  
Qualcomm Technologies Netherlands B.V.  
tacos@qti.qualcomm.com

**Mario Geiger**  
PCSL Research Group  
EPFL  
mario.geiger@epfl.ch

**Maurice Weiler**  
QUVA Lab  
U. of Amsterdam  
m.weiler@uva.nl

## A General facts about Groups and Quotients

Let  $G$  be a group and  $H$  a subgroup of  $G$ . A left coset of  $H$  in  $G$  is a set  $gH = \{gh \mid h \in H\}$  for  $g \in G$ . The cosets form a partition of  $G$ . The set of all cosets is called the quotient space or coset space, and is denoted  $G/H$ . There is a canonical projection  $p : G \rightarrow G/H$  that assigns to each element  $g$  the coset it is in. This can be written as  $p(g) = gH$ . Fig. 1 provides an illustration for the group of symmetries of a triangle, and the subgroup  $H$  of reflections.

The quotient space carries a left action of  $G$ , which we denote with  $ux$  for  $u \in G$  and  $x \in G/H$ . This works fine because this action is associative with the group operation:

$$u(gH) = (ug)H. \quad (1)$$

for  $u, g \in G$ . One may verify that this action is well defined, i.e. does not depend on the particular coset representative  $g$ . Furthermore, the action is transitive, meaning that we can reach any coset from any other coset by transforming it with an appropriate  $u \in G$ . A space like  $G/H$  on which  $G$  acts transitively is called a homogeneous space for  $G$ . Indeed, any homogeneous space is isomorphic to some quotient space  $G/H$ .

A section of  $p$  is a map  $s : G/H \rightarrow G$  such that  $p \circ s = \text{id}_{G/H}$ . We can think of  $s$  as choosing a coset representative for each coset, i.e.  $s(x) \in x$ . In general, although  $p$  is unique,  $s$  is not; there can be many ways to choose coset representatives. However, the constructions we consider will always be independent of the particular choice of section.

Although it is not strictly necessary, we will assume that  $s$  maps the coset  $H = eH$  of the identity to the identity  $e \in G$ :

$$s(H) = e \quad (2)$$

We can always do this, for given a section  $s'$  with  $s'(H) = h \neq e$ , we can define the section  $s(x) = h^{-1}s'(hx)$  so that  $s(H) = h^{-1}s'(hH) = h^{-1}s'(H) = h^{-1}h = e$ . This is indeed a section, for  $p(s(x)) = p(h^{-1}s'(hx)) = h^{-1}p(s'(hx)) = h^{-1}hx = x$  (where we used Eq. 1 which can be rewritten as  $up(g) = p(ug)$ ).

One useful rule of calculation is

$$(gs(x))H = g(s(x)H) = gx = s(gx)H, \quad (3)$$

for  $g \in G$  and  $x \in G/H$ . The projection onto  $H$  is necessary, for in general  $gs(x) \neq s(gx)$ . These two terms are however related, through a function  $h : G/H \times G \rightarrow H$ , defined as follows:

$$gs(x) = s(gx)h(x, g) \quad (4)$$

That is,

$$\boxed{h(x, g) = s(gx)^{-1}gs(x)}. \quad (5)$$

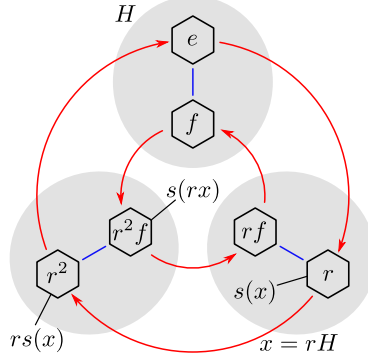

Figure 1: A Cayley diagram of the group  $D_3$  of symmetries of a triangle. The group is generated by rotations  $r$  and flips  $f$ . The elements of the group are indicated by hexagons. The red arrows correspond to right multiplication by  $r$ , while the blue lines correspond to right multiplication by  $f$ . Cosets of the group of flips ( $H = \{e, f\}$ ) are shaded in gray. As always, the cosets partition the group. As coset representatives, we choose  $s(H) = e$ ,  $s(rH) = r$ , and  $s(r^2H) = r^2f$ . The difference between  $s(rx)$  and  $rs(x)$  is indicated. For this choice of section, we must set  $h(x, r) = h(rH, r) = f$ , so that  $s(rx)h(x, r) = (r^2f)(f) = r^2 = rs(x)$ .

We can think of  $h(x, g)$  as the element of  $H$  that we can apply to  $s(gx)$  (on the right) to get  $gs(x)$ . The  $h$  function will play an important role in the definition of the induced representation, and is illustrated in Fig. 1.

From the fiber bundle perspective, we can interpret Eq. 5 as follows. The group  $G$  can be viewed as a principal bundle with base space  $G/H$  and fibers  $gH$ . If we apply  $g$  to the coset representative  $s(x)$ , we move to a different coset, namely the one represented by  $s(gx)$  (representing a different point in the base space). Additionally, the fiber is twisted by the right action of  $h(x, g)$ . That is,  $h(x, g)$  moves  $s(gx)$  to another element in its coset, namely to  $gs(x)$ .

The following composition rule for  $h$  is very useful in derivations:

$$\begin{aligned} h(x, g_1 g_2) &= s(g_1 g_2 x)^{-1} g_1 g_2 s(x) \\ &= [s(g_1 g_2 x)^{-1} g_1 s(g_2 x)] [s(g_2 x)^{-1} g_2 s(x)] \\ &= h(g_2 x, g_1) h(x, g_2) \end{aligned} \quad (6)$$

For elements  $h \in H$ , we find:

$$h(H, h) = s(H)^{-1} h s(H) = h. \quad (7)$$

Also, for any coset  $x$ ,

$$h(H, s(x)) = s(s(x)H)^{-1} s(x) s(H) = s(H) = e. \quad (8)$$

Using Eq. 6 and 8, this yields,

$$h(H, s(x)h) = h(hH, s(x))h(H, h) = h, \quad (9)$$

for any  $h \in H$  and  $x \in G/H$ .

For  $x = H$ , Eq. 5 specializes to:

$$g = gs(H) = s(gH)h(H, g) \equiv s(gH)h(g), \quad (10)$$

where we defined

$$\boxed{h(g) = h(H, g) = s(gH)^{-1} g} \quad (11)$$

This shows that we can always factorize  $g$  *uniquely* into a part  $s(gH)$  that represents the coset of  $g$ , and a part  $h(g) \in H$  that tells us where  $g$  is within the coset:

$$g = s(gH)h(g) \quad (12)$$

A useful property of  $h(g)$  is that for any  $h \in H$ ,

$$h(gh) = s(ghH)^{-1} gh = s(gH)^{-1} gh = h(g)h. \quad (13)$$

It is also easy to see that

$$h(s(x)) = e. \quad (14)$$

When dealing with different subgroups  $H_1$  and  $H_2$  of  $G$  (associated with the input and output space of an intertwiner), we will write  $h_i$  for an element of  $H_i$ ,  $s_i : G/H_i \rightarrow G$ , for the corresponding section, and  $h_i : G/H_i \times G \rightarrow H_i$  for the  $h$ -function (for  $i = 1, 2$ ).

### A.1 Double cosets

A  $(H_2, H_1)$ -double coset is a set of the form  $H_2gH_1$  for  $H_2, H_1$  subgroups of  $G$ . The space of  $(H_2, H_1)$ -double cosets is called  $H_2 \backslash G/H_1 \equiv \{H_2gH_1 \mid g \in G\}$ . As with left cosets, we assume a section  $\gamma : H_2 \backslash G/H_1 \rightarrow G$  is given, satisfying  $\gamma(H_2gH_1) \in H_2gH_1$ .

The double coset space  $H_2 \backslash G/H_1$  can be understood as the space of  $H_2$ -orbits in  $G/H_1$ , that is,  $H_2 \backslash G/H_1 = \{H_2x \mid x \in G/H_1\}$ . Note that although  $G$  acts transitively on  $G/H_1$  (meaning that there is only one  $G$ -orbit in  $G/H_1$ ), the subgroup  $H_2$  does not. Hence, the space  $G/H_1$  splits into a number of disjoint orbits  $H_2x$  (for  $x = gH_1 \in G/H_1$ ), and these are precisely the double cosets  $H_2gH_1$ .

Of course,  $H_2$  *does* act transitively within a single orbit  $H_2x$ , sending  $x \mapsto h_2x$  (both of which are in  $H_2x$ , for  $x \in G/H_1$ ). In general this action is not necessarily fixed point free which means that there may exist some  $h_2 \in H_2$  which map the left cosets to themselves. These are exactly the elements in the stabilizer of  $x = gH_1$ , given by

$$\begin{aligned} H_2^x &= \{h \in H_2 \mid hx = x\} \\ &= \{h \in H_2 \mid hs_1(x)H_1 = s_1(x)H_1\} \\ &= \{h \in H_2 \mid hs_1(x) \in s_1(x)H_1\} \\ &= \{h \in H_2 \mid h \in s_1(x)H_1s_1(x)^{-1}\} \\ &= s_1(x)H_1s_1(x)^{-1} \cap H_2. \end{aligned} \quad (15)$$

Clearly,  $H_2^x$  is a subgroup of  $H_2$ . Furthermore,  $H_2^x$  is conjugate to (and hence isomorphic to) the subgroup  $s_1(x)^{-1}H_2^x s_1(x) = H_1 \cap s_1(x)^{-1}H_2s_1(x)$ , which is a subgroup of  $H_1$ .

For double cosets  $x \in H_2 \backslash G/H_1$ , we will overload the notation to  $H_2^x \equiv H_2^{\gamma(x)H_1}$ . Like the coset stabilizer, this double coset stabilizer can be expressed as

$$H_2^x = \gamma(x)H_1\gamma(x)^{-1} \cap H_2 \quad (16)$$

### A.2 Semidirect products

For a semidirect product group  $G$ , such as  $\text{SE}(2) = \mathbb{R}^2 \rtimes \text{SO}(2)$ , some things simplify. Let  $G = N \rtimes H$  where  $H \leq G$  is a subgroup,  $N \leq G$  is a normal subgroup and  $N \cap H = \{e\}$ . For every  $g \in G$  there is a unique way of decomposing it into  $nh$  where  $n \in N$  and  $h \in H$ . Thus, the left  $H$  coset of  $g \in G$  depends only on the  $N$  part of  $g$ :

$$gH = nhH = nH \quad (17)$$

It follows that for a semidirect product group, we can define the section so that it always outputs an element of  $N \subseteq G$ , instead of a general element of  $G$ . Specifically, we can set  $s(gH) = s(nhH) = s(nH) = n$ . It follows that  $s(nx) = ns(x) \quad \forall n \in N, x \in G/H$ . This allow us to simplify expressions involving  $h$ :

$$\begin{aligned} h(x, g) &= s(gx)^{-1}gs(x) \\ &= s(gs(x)H)^{-1}gs(x) \\ &= \underbrace{s(gs(x)g^{-1}gH)^{-1}}_{\in N}gs(x) \\ &= (gs(x)g^{-1}s(gH))^{-1}gs(x) \\ &= s(gH)^{-1}g \\ &= h(g) \end{aligned} \quad (18)$$

### A.3 Haar measure

When we integrate over a group  $G$ , we will use the Haar measure, which is the essentially unique measure  $dg$  that is invariant in the following sense:

$$\int_G f(g)dg = \int_G f(ug)dg \quad \forall u \in G. \quad (19)$$

Such measures always exist for locally compact groups, thus covering most cases of interest [Folland, 1995]. For discrete groups, the Haar measure is the counting measure, and integration can be understood as a discrete sum.

We can integrate over  $G/H$  by using an integral over  $G$ ,

$$\int_{G/H} f(x)dx = \int_G f(gH)dg. \quad (20)$$

## B Proofs

### B.1 Bi-equivariance of one-argument kernels on $G$

#### B.1.1 Left equivariance of $\kappa$

We want the result  $\kappa \star f$  (or  $\kappa \cdot f$ ) to live in  $\mathcal{I}_G^2$ , which means that this function has to satisfy the Mackey condition,

$$\begin{aligned} [\kappa \star f](gh_2) &= \rho_2(h_2^{-1})[\kappa \star f](g) \\ \Leftrightarrow \int_G \kappa((gh_2)^{-1}g')f(g')dg' &= \rho_2(h_2^{-1}) \int_G \kappa(g^{-1}g')f(g')dg' \\ \Leftrightarrow \kappa(h_2^{-1}g^{-1}g') &= \rho_2(h_2^{-1})\kappa(g^{-1}g') \\ \Leftrightarrow \kappa(h_2g) &= \rho_2(h_2)\kappa(g) \end{aligned} \quad (21)$$

for all  $h_2 \in H_2$  and  $g \in G$ .

#### B.1.2 Right equivariance of $\kappa$

The fact that  $f \in \mathcal{I}_G^1$  satisfies the Mackey condition ( $f(gh) = \rho_1(h)f(g)$  for  $h \in H_1$ ) implies a symmetry in the correlation  $\kappa \star f$ . That is, if we apply a right- $H_1$ -shift to the kernel, i.e.  $[R_h\kappa](g) = \kappa(gh)$ , we find that

$$\begin{aligned} [[R_h\kappa] \star f](g) &= \int_G \kappa(g^{-1}uh)f(u)du \\ &= \int_G \kappa(g^{-1}u)f(uh^{-1})du \\ &= \int_G \kappa(g^{-1}u)\rho_1(h)f(u)du. \end{aligned} \quad (22)$$

It follows that we can take (for  $h \in H_1$ ),

$$\kappa(gh) = \kappa(g)\rho_1(h). \quad (23)$$

### B.2 Kernels on $H_2 \backslash G / H_1$

We have seen the space  $\mathcal{K}_C$  of  $H_2$ -equivariant kernels on  $G/H_1$  appear in our analysis of both  $\mathcal{I}_G$  and  $\mathcal{I}_C$ . Kernels in this space have to satisfy the constraint (for  $h \in H_2$ ):

$$\overleftarrow{\kappa}(hy) = \rho_2(h)\overleftarrow{\kappa}(y)\rho_1(h_1(y, h)^{-1}) \quad (24)$$

Here we will show that this space is equivalent to the space

$$\boxed{\mathcal{K}_D = \{\bar{\kappa} : H_2 \backslash G / H_1 \rightarrow \text{Hom}(V_1, V_2) \mid \bar{\kappa}(x) = \rho_2(h)\bar{\kappa}(x)\rho_1^x(h)^{-1}, \quad \forall x \in H_2 \backslash G / H_1, h \in H_2^{\gamma(x)H_1}\},} \quad (25)$$

where we defined the representation  $\rho_1^x$  of the stabilizer  $H_2^{\gamma(x)H_1}$ ,

$$\begin{aligned}\rho_1^x(h) &= \rho_1(h_1(\gamma(x)H_1, h)) \\ &= \rho_1(\gamma(x)^{-1}h\gamma(x)),\end{aligned}\tag{26}$$

with the section  $\gamma : H_2 \backslash G/H_1 \rightarrow G$  being defined as in section A.1. To show the equivalence of  $\mathcal{K}_C$  and  $\mathcal{K}_D$ , we define an isomorphism  $\Omega_{\mathcal{K}} : \mathcal{K}_D \rightarrow \mathcal{K}_C$ . We begin by defining  $\Omega_{\mathcal{K}}^{-1}$ :

$$\bar{\kappa}(x) = [\Omega_{\mathcal{K}}^{-1} \overleftarrow{\kappa}](x) = \overleftarrow{\kappa}(\gamma(x)H_1).\tag{27}$$

We verify that for  $\overleftarrow{\kappa} \in \mathcal{K}_C$  we have  $\bar{\kappa} \in \mathcal{K}_D$ . Let  $h \in H_2^{\gamma(x)H_1}$ , then

$$\begin{aligned}\bar{\kappa}(x) &= \overleftarrow{\kappa}(\gamma(x)H_1) \\ &= \overleftarrow{\kappa}(h\gamma(x)H_1) \\ &= \rho_2(h)\overleftarrow{\kappa}(\gamma(x)H_1)\rho_1(h_1(\gamma(x)H_1, h))^{-1} \\ &= \rho_2(h)\bar{\kappa}(x)\rho_1^x(h)^{-1}\end{aligned}\tag{28}$$

To define  $\Omega_{\mathcal{K}}$ , we use the decomposition  $y = h\gamma(H_2y)H_1$  for  $y \in G/H_1$  and  $h \in H_2$ . Note that  $h$  may not be unique, because  $H_2$  does not in general act freely on  $G/H_1$ .

$$\overleftarrow{\kappa}(y) = [\Omega_{\mathcal{K}}\bar{\kappa}](y) = [\Omega_{\mathcal{K}}\bar{\kappa}](h\gamma(H_2y)H_1) = \rho_2(h)\bar{\kappa}(H_2y)\rho_1(h_1(\gamma(H_2y)H_1, h))^{-1}.\tag{29}$$

We verify that for  $\bar{\kappa} \in \mathcal{K}_D$  we have  $\overleftarrow{\kappa} \in \mathcal{K}_C$ .

$$\begin{aligned}\overleftarrow{\kappa}(h'y) &= \overleftarrow{\kappa}(h'h\gamma(H_2y)H_1) \\ &= \rho_2(h'h)\bar{\kappa}(H_2y)\rho_1(h_1(\gamma(H_2y)H_1, h'h))^{-1} \\ &= \rho_2(h'h)\bar{\kappa}(H_2y)\rho_1(h_1(h\gamma(H_2y)H_1, h')h_1(\gamma(H_2y)H_1, h))^{-1} \\ &= \rho_2(h')\rho_2(h)\bar{\kappa}(H_2y)\rho_1(h_1(\gamma(H_2y)H_1, h))^{-1}\rho_1(h_1(h\gamma(H_2y)H_1, h'))^{-1} \\ &= \rho_2(h')\rho_2(h)\bar{\kappa}(H_2y)\rho_1(h_1(\gamma(H_2y)H_1, h))^{-1}\rho_1(h_1(y, h'))^{-1} \\ &= \rho_2(h')\overleftarrow{\kappa}(y)\rho_1(h_1(y, h'))^{-1}\end{aligned}\tag{30}$$

We verify that  $\Omega_{\mathcal{K}}$  and  $\Omega_{\mathcal{K}}^{-1}$  are indeed inverses:

$$\begin{aligned}[\Omega_{\mathcal{K}}[\Omega_{\mathcal{K}}^{-1}\overleftarrow{\kappa}]](y) &= [\Omega_{\mathcal{K}}[\Omega_{\mathcal{K}}^{-1}\overleftarrow{\kappa}]](h\gamma(H_2y)H_1) \\ &= \rho_2(h)[\Omega_{\mathcal{K}}^{-1}\overleftarrow{\kappa}](H_2y)\rho_1(h_1(\gamma(H_2y)H_1, h))^{-1} \\ &= \rho_2(h)\overleftarrow{\kappa}(\gamma(H_2y)H_1)\rho_1(h_1(\gamma(H_2y)H_1, h))^{-1} \\ &= \overleftarrow{\kappa}(h\gamma(H_2y)H_1) \\ &= \overleftarrow{\kappa}(y).\end{aligned}\tag{31}$$

In the other direction,

$$\begin{aligned}[\Omega_{\mathcal{K}}^{-1}[\Omega_{\mathcal{K}}\bar{\kappa}]](x) &= [\Omega_{\mathcal{K}}\bar{\kappa}](\gamma(x)H_1) \\ &= [\Omega_{\mathcal{K}}\bar{\kappa}](\gamma(H_2\gamma(x)H_1)H_1) \\ &= \rho_2(e)\bar{\kappa}(H_2\gamma(x)H_1)\rho_1(h_1(\gamma(H_2\gamma(x)H_1)H_1, e))^{-1} \\ &= \bar{\kappa}(x)\end{aligned}\tag{32}$$

## C Limitations of the Theory

The theory presented here is quite general but still has several limitations. Firstly, we only cover fields over homogeneous spaces. Although fields can be defined over more general manifolds, and indeed there has been some effort aimed at defining convolutional networks on general (or Riemannian) manifolds [Bronstein et al., 2017], we restrict our attention to homogeneous spaces because they come naturally equipped with a group action to which the network can be made equivariant. A more general theory would not be able to make use of this additional structure.

For reasons of mathematical elegance and simplicity, the theory idealizes feature maps as fields over a possibly continuous base space, but a computer implementation will usually involve discretizing this space. A similar approach is used in signal processing, where discretization is justified by various sampling theorems and band-limit assumptions. It seems likely that a similar theory can be developed for deep networks, but this has not been done yet.

## D Classification of Equivariant CNNs

| $G$                                      | $H$                     | $G/H$          | $\rho$             | Reference                                                                    |
|------------------------------------------|-------------------------|----------------|--------------------|------------------------------------------------------------------------------|
| $\mathbb{Z}^2$                           | $\{1\}$                 | $\mathbb{Z}^2$ | regular            | Lecun 1990 LeCun et al. [1990]                                               |
| $p4, p4m$                                | $C_4, D_4$              | $\mathbb{Z}^2$ | regular            | Cohen 2016 Cohen and Welling [2016],<br>Dieleman 2016 Dieleman et al. [2016] |
| "                                        | "                       | "              | "                  |                                                                              |
| $p4, p4m$                                | $C_4, D_4$              | $\mathbb{Z}^2$ | irrep & regular    | Cohen 2017 Cohen and Welling [2017]                                          |
| $p6, p6m$                                | $C_6, D_6$              | $\mathbb{Z}^2$ | regular            | Hoogetboom 2018 Hoogetboom et al. [2018]                                     |
| $\mathbb{Z}^3 \rtimes H$                 | $D_4, D_{4h}, O, O_h$   | $\mathbb{Z}^3$ | regular            | Winkels 2018 Winkels and Cohen [2018]                                        |
| $\mathbb{Z}^3 \rtimes H$                 | $V, T_4, O$             | $\mathbb{Z}^3$ | regular            | Worrall 2018 Worrall and Brostow [2018]                                      |
| $\mathbb{R}^2 \rtimes C_N$               | $C_N$                   | $\mathbb{R}^2$ | regular            | Weiler 2017 Weiler et al. [2018a]                                            |
| "                                        | "                       | "              | "                  | Zhou 2017 Zhou et al. [2017]                                                 |
| "                                        | "                       | "              | "                  | Bekkers 2018 Bekkers et al. [2018]                                           |
| "                                        | "                       | "              | irrep & regular    | Marcos 2017 Marcos et al. [2017]                                             |
| $SE(2)$                                  | $SO(2)$                 | $\mathbb{R}^2$ | irrep              | Worrall 2017 Worrall et al. [2017]                                           |
| $\mathbb{R}^2 \rtimes H \leq E(2)$       | $O(2), SO(2), C_N, D_N$ | $\mathbb{R}^2$ | any representation | Weiler 2019 Weiler and Cesa [2019]                                           |
| $\mathbb{R}^2 \rtimes (\mathbb{R}^+, *)$ | $(\mathbb{R}^+, *)$     | $\mathbb{R}^2$ | regular & trivial  | Ghosh 2019 Ghosh and Gupta [2019]                                            |
| "                                        | "                       | "              | regular            | Worrall 2019 Worrall and Welling [2019]                                      |
| "                                        | "                       | "              | "                  | Sosnovik 2019 Sosnovik et al. [2019]                                         |
| $SE(3)$                                  | $SO(3)$                 | $\mathbb{R}^3$ | irrep              | Kondor 2018 Kondor [2018]                                                    |
| "                                        | "                       | "              | irrep & regular    | Thomas 2018 Thomas et al. [2018]                                             |
| "                                        | "                       | "              | irrep              | Weiler 2018 Weiler et al. [2018b]                                            |
| "                                        | "                       | "              | irrep              | Kondor 2018 Kondor et al. [2018]                                             |
| "                                        | "                       | "              | irrep              | Anderson 2019 Anderson et al. [2019]                                         |
| $SO(3)$                                  | $SO(2)$                 | $S^2$          | regular            | Cohen 2018 Cohen et al. [2018]                                               |
| "                                        | "                       | "              | trivial            | Esteves 2018 Esteves et al. [2018]                                           |
| "                                        | "                       | "              | "                  | Perraudin 2018 Perraudin et al. [2018]                                       |
| "                                        | "                       | "              | irrep              | Jiang 2019 Jiang et al. [2019]                                               |
| $G$                                      | $H$                     | $G/H$          | trivial            | Kondor 2018 Kondor and Trivedi [2018]                                        |

Table 1: A taxonomy of G-CNNs. Methods are classified by the group  $G$  they are equivariant to, the subgroup  $H$  that acts on the fibers, the base space  $G/H$  to which the fibers are attached (implied by  $G$  and  $H$ ), and the type of field  $\rho$  (regular, irreducible or trivial).

## References

- G B Folland. *A Course in Abstract Harmonic Analysis*. CRC Press, 1995.
- Michael M Bronstein, Joan Bruna, Yann LeCun, Arthur Szlam, and Pierre Vandergheynst. Geometric deep learning: going beyond euclidean data. *IEEE Signal Processing Magazine* 34, 2017.
- Yann LeCun, Bernhard E Boser, John S Denker, Donnie Henderson, R E Howard, Wayne E Hubbard, and Lawrence D Jackel. Handwritten digit recognition with a Back-Propagation network. In D S Touretzky, editor, *Advances in Neural Information Processing Systems 2*, pages 396–404. Morgan-Kaufmann, 1990.
- Taco S Cohen and Max Welling. Group equivariant convolutional networks. In *Proceedings of The 33rd International Conference on Machine Learning (ICML)*, volume 48, pages 2990–2999, 2016.
- S Dieleman, J De Fauw, and K Kavukcuoglu. Exploiting cyclic symmetry in convolutional neural networks. In *International Conference on Machine Learning (ICML)*, 2016.
- Taco S Cohen and Max Welling. Steerable CNNs. In *ICLR*, 2017.
- Emiel Hoogetboom, Jorn W T Peters, Taco S Cohen, and Max Welling. HexaConv. In *International Conference on Learning Representations (ICLR)*, 2018.
- Marysia Winkels and Taco S Cohen. 3D G-CNNs for pulmonary nodule detection. In *International Conference on Medical Imaging with Deep Learning (MIDL)*, 2018.
- Daniel Worrall and Gabriel Brostow. CubeNet: Equivariance to 3D rotation and translation. In *European Conference on Computer Vision (ECCV)*, 2018.

- Maurice Weiler, Fred A Hamprecht, and Martin Storath. Learning steerable filters for rotation equivariant CNNs. In *The IEEE Conference on Computer Vision and Pattern Recognition (CVPR)*, June 2018a.
- Yanzhao Zhou, Qixiang Ye, Qiang Qiu, and Jianbin Jiao. Oriented response networks. In *CVPR*, 2017.
- Erik J Bekkers, Maxime W Lafarge, Mitko Veta, Koen A J Eppenhof, and Josien P W Pluim. Roto-Translation covariant convolutional networks for medical image analysis. In *Medical Image Computing and Computer Assisted Intervention (MICCAI)*, 2018.
- Diego Marcos, Michele Volpi, Nikos Komodakis, and Devis Tuia. Rotation equivariant vector field networks. In *International Conference on Computer Vision (ICCV)*, 2017.
- Daniel E Worrall, Stephan J Garbin, Daniyar Turmukhambetov, and Gabriel J Brostow. Harmonic networks: Deep translation and rotation equivariance. In *The IEEE Conference on Computer Vision and Pattern Recognition (CVPR)*, July 2017.
- Maurice Weiler and Gabriele Cesa. General E(2)-Equivariant Steerable CNNs. In *Advances in Neural Information Processing Systems (NeurIPS)*, 2019.
- Rohan Ghosh and Anupam K Gupta. Scale steerable filters for locally scale-invariant convolutional neural networks. *arXiv preprint arXiv:1906.03861*, 2019.
- Daniel E Worrall and Max Welling. Deep scale-spaces: Equivariance over scale. In *International Conference on Machine Learning (ICML)*, 2019.
- Ivan Sosnovik, Michał Szmaja, and Arnold Smeulders. Scale-equivariant steerable networks, 2019.
- Risi Kondor. N-body networks: a covariant hierarchical neural network architecture for learning atomic potentials. *arXiv:1803.01588 [cs.LG]*, 2018.
- Nathaniel Thomas, Tess Smidt, Steven Kearnes, Lusann Yang, Li Li, Kai Kohlhoff, and Patrick Riley. Tensor field networks: Rotation- and Translation-Equivariant neural networks for 3D point clouds. *arXiv:1802.08219 [cs.LG]*, 2018.
- Maurice Weiler, Mario Geiger, Max Welling, Wouter Boomsma, and Taco Cohen. 3D steerable CNNs: Learning rotationally equivariant features in volumetric data. In *Advances in Neural Information Processing Systems (NeurIPS)*, 2018b.
- Risi Kondor, Zhen Lin, and Shubhendu Trivedi. Clebsch–Gordan Nets: A Fully Fourier Space Spherical Convolutional Neural Network. In *Conference on Neural Information Processing Systems (NeurIPS)*, 2018.
- Brandon Anderson, Truong-Son Hy, and Risi Kondor. Cormorant: Covariant molecular neural networks. *arXiv preprint arXiv:1906.04015*, 2019.
- Taco S Cohen, Mario Geiger, Jonas Koehler, and Max Welling. Spherical CNNs. In *International Conference on Learning Representations (ICLR)*, 2018.
- Carlos Esteves, Christine Allen-Blanchette, Ameesh Makadia, and Kostas Daniilidis. 3D object classification and retrieval with spherical CNNs. In *European Conference on Computer Vision (ECCV)*, 2018.
- Nathanaël Perraudin, Michaël Defferrard, Tomasz Kacprzak, and Raphael Sgier. DeepSphere: Efficient spherical Convolutional Neural Network with HEALPix sampling for cosmological applications. *Astronomy and Computing* 27, 2018.
- Chiyu Jiang, Jingwei Huang, Karthik Kashinath, Prabhat, Philip Marcus, and Matthias Niessner. Spherical CNNs on unstructured grids. In *International Conference on Learning Representations (ICLR)*, 2019.
- Risi Kondor and Shubhendu Trivedi. On the generalization of equivariance and convolution in neural networks to the action of compact groups. In *International Conference on Machine Learning (ICML)*, 2018.
